# Supplementary material
Source: publisher figshare collection journal article supplement (https://geolsoc.figshare.com/ndownloader/files/18541646)
Supplement: Supplementary file 1 [file 18541646]

## Sheet: Igneous
Analyses	Hf176/Hf177	2 S.E.	Lu176/Hf177	Interpreted crystallisation age (Ma)	Uncertainty (2sigma)		Hf Chur (t)	Hf DM (t)	Hf NC(t)	Hfi	epsilon	2s	T(DM) (Crustal)	T(NC) (Crustal)
Jebel Akhdar
O14-04
MB_O1_04-01	0.282489	2.24562e-05	0.00106737	775	21		0.282296	0.282691	0.282608	0.282473	6.28359	0.785968	1.26008	1.0751
MB_O1_04-02	0.282544	3.50883e-05	0.00159644	775	21		0.282296	0.282691	0.282608	0.282521	7.98238	1.22809	1.15362	0.968266
MB_O1_04-03	0.282512	2.70787e-05	0.00159679	775	21		0.282296	0.282691	0.282608	0.282489	6.83734	0.947754	1.2254	1.0403
MB_O1_04-04	0.282542	3.52766e-05	0.00228513	775	21		0.282296	0.282691	0.282608	0.282509	7.55768	1.23468	1.18025	0.994994
MB_O1_04-06	0.282538	2.62592e-05	0.00152429	775	21		0.282296	0.282691	0.282608	0.282516	7.80691	0.919072	1.16462	0.979311
MB_O1_04-07	0.282494	2.57225e-05	0.0015471	775	21		0.282296	0.282691	0.282608	0.282472	6.22358	0.900287	1.26384	1.07887
MB_O1_04-12	0.282491	2.97515e-05	0.00142103	775	21		0.282296	0.282691	0.282608	0.28247	6.18243	1.0413	1.26641	1.08145
MB_O1_04-13	0.28249	2.94731e-05	0.00206827	775	21		0.282296	0.282691	0.282608	0.28246	5.80395	1.03156	1.2901	1.10522
MB_O1_04-20	0.282505	3.39773e-05	0.00271173	775	21		0.282296	0.282691	0.282608	0.282465	6.00115	1.1892	1.27776	1.09284
MB_O1_04-27	0.282523	3.08833e-05	0.00221648	775	21		0.282296	0.282691	0.282608	0.28249	6.88974	1.08091	1.22212	1.037
O14-08
MB_O1_08-04	0.282515	2.76292e-05	0.00164848	794	24		0.282284	0.282677	0.282594	0.282491	7.3374	0.967022	1.20901	1.02437
MB_O1_08-07	0.282523	2.99936e-05	0.00117319	794	24		0.282284	0.282677	0.282594	0.282506	7.86445	1.04977	1.17598	0.99123
MB_O1_08-08	0.282536	3.53157e-05	0.00276154	794	24		0.282284	0.282677	0.282594	0.282495	7.49256	1.23605	1.19929	1.01462
MB_O1_08-12	0.282558	3.59608e-05	0.0017481	794	24		0.282284	0.282677	0.282594	0.282532	8.80146	1.25863	1.11721	0.932254
MB_O1_08-13	0.282555	3.18853e-05	0.00211232	794	24		0.282284	0.282677	0.282594	0.282523	8.4767	1.11598	1.13759	0.952702
MB_O1_08-15	0.282534	3.16857e-05	0.00205561	794	24		0.282284	0.282677	0.282594	0.282503	7.77712	1.109	1.18146	0.996723
MB_O1_08-17	0.282509	3.06342e-05	0.0016819	794	24		0.282284	0.282677	0.282594	0.282484	7.09462	1.0722	1.22422	1.03963
MB_O1_08-18	0.282541	3.44702e-05	0.0025899	794	24		0.282284	0.282677	0.282594	0.282502	7.74431	1.20646	1.18351	0.998786
MB_O1_08-20	0.282527	4.76878e-05	0.00223264	794	24		0.282284	0.282677	0.282594	0.282494	7.4522	1.66907	1.20182	1.01716
MB_O1_08-25	0.282489	3.34096e-05	0.00219866	794	24		0.282284	0.282677	0.282594	0.282456	6.10835	1.16934	1.28596	1.10158
MB_O1_08-27	0.282582	3.4941e-05	0.00159607	794	24		0.282284	0.282677	0.282594	0.282559	9.73569	1.22293	1.05855	0.873389
MB_O1_08-29	0.282406	4.69336e-05	0.00276863	794	24		0.282284	0.282677	0.282594	0.282365	2.86687	1.64268	1.48836	1.30469
Al Jobah, Huqf area
AJ14-19
MB_AJ19_22	0.282476	1.77416e-05	0.000201844	855	8		0.282245	0.282633	0.28255	0.282473	8.06722	0.620957	1.21136	1.02841
MB_AJ19_30	0.282601	3.47506e-05	0.00254542	855	8		0.282245	0.282633	0.28255	0.28256	11.1782	1.21627	1.01628	0.832655
MB_AJ19_31	0.282569	2.40618e-05	0.0011922	855	8		0.282245	0.282633	0.28255	0.28255	10.8027	0.842161	1.03986	0.856321
MB_AJ19_33	0.282571	2.3824e-05	0.00096663	855	8		0.282245	0.282633	0.28255	0.282555	10.9905	0.83384	1.02807	0.844485
MB_AJ19_34	0.282559	1.94116e-05	0.000673685	902	12.5		0.282216	0.282599	0.282517	0.282547	11.7474	0.679407	1.0171	0.834744
MB_AJ19_36	0.282556	2.43786e-05	0.00142508	855	8		0.282245	0.282633	0.28255	0.282533	10.2051	0.85325	1.07737	0.893959
MB_AJ19_39	0.282601	3.00606e-05	0.00188614	855	8		0.282245	0.282633	0.28255	0.28257	11.525	1.05212	0.994486	0.810787
MB_AJ19_47	0.282585	2.50209e-05	0.00182801	855	8		0.282245	0.282633	0.28255	0.282555	11.0022	0.875732	1.02733	0.843743
MB_AJ19_55	0.282576	2.33039e-05	0.00135875	855	8		0.282245	0.282633	0.28255	0.282554	10.9665	0.815637	1.02958	0.845997
MB_AJ19_56	0.282555	2.31974e-05	0.0014503	855	8		0.282245	0.282633	0.28255	0.282532	10.161	0.81191	1.08014	0.896736
MB_AJ19_57	0.282572	2.45057e-05	0.00158487	855	8		0.282245	0.282633	0.28255	0.282547	10.6981	0.857699	1.04643	0.862908
MB_AJ19_63	0.282563	2.87798e-05	0.00159741	855	8		0.282245	0.282633	0.28255	0.282538	10.3735	1.00729	1.0668	0.883354
AJ14-23
MB_AJ23_02	0.28258	2.94335e-05	0.00173896	861	13		0.282241	0.282628	0.282546	0.282552	11.018	1.03017	1.0311	0.847695
MB_AJ23_08	0.282562	2.59107e-05	0.0016873	861	13		0.282241	0.282628	0.282546	0.282535	10.4015	0.906873	1.06981	0.886532
MB_AJ23_09	0.282587	2.62283e-05	0.0016571	861	13		0.282241	0.282628	0.282546	0.28256	11.316	0.917992	1.01238	0.828911
MB_AJ23_12	0.282557	2.40007e-05	0.00150053	861	13		0.282241	0.282628	0.282546	0.282533	10.337	0.840023	1.07386	0.890594
MB_AJ23_15	0.282564	2.34679e-05	0.0014439	861	13		0.282241	0.282628	0.282546	0.282541	10.6097	0.821377	1.05674	0.873417
MB_AJ23_19	0.282566	2.41608e-05	0.00193394	861	13		0.282241	0.282628	0.282546	0.282535	10.4089	0.845627	1.06934	0.886065
MB_AJ23_20	0.282573	3.33342e-05	0.00245188	861	13		0.282241	0.282628	0.282546	0.282534	10.3683	1.1667	1.07189	0.888621
MB_AJ23_21	0.282559	2.57424e-05	0.00130456	861	13		0.282241	0.282628	0.282546	0.282538	10.5163	0.900984	1.0626	0.879303
MB_AJ23_25	0.28257	2.56496e-05	0.0017932	861	13		0.282241	0.282628	0.282546	0.282541	10.6192	0.897734	1.05614	0.872819
MB_AJ23_26	0.282578	2.74252e-05	0.00175742	861	13		0.282241	0.282628	0.282546	0.282549	10.9145	0.959881	1.0376	0.854214
MB_AJ23_28	0.282555	2.901e-05	0.00148684	861	13		0.282241	0.282628	0.282546	0.282531	10.2817	1.01535	1.07732	0.894072
AJ14-25
MB_AJ25_01	0.28256	1.84948e-05	0.00262433	837	4		0.282256	0.282646	0.282563	0.282519	9.29716	0.647318	1.12008	0.936321
MB_AJ25_04	0.282599	1.83116e-05	0.00114802	837	4		0.282256	0.282646	0.282563	0.282581	11.513	0.640907	0.980936	0.796694
MB_AJ25_09	0.282521	1.8999e-05	0.00181005	837	4		0.282256	0.282646	0.282563	0.282493	8.37428	0.664966	1.17793	0.994369
MB_AJ25_11	0.282557	2.54682e-05	0.0010237	837	4		0.282256	0.282646	0.282563	0.282541	10.0906	0.891388	1.0703	0.886364
MB_AJ25_12	0.282562	3.36243e-05	0.000700262	837	4		0.282256	0.282646	0.282563	0.282551	10.4465	1.17685	1.04795	0.86394
MB_AJ25_13	0.282551	2.80822e-05	0.000982461	837	4		0.282256	0.282646	0.282563	0.282535	9.87891	0.982875	1.08359	0.899698
MB_AJ25_16	0.282558	2.90309e-05	0.00138864	904	12		0.282214	0.282597	0.282515	0.282535	11.3677	1.01608	1.04331	0.861131
MB_AJ25_17	0.282541	2.37889e-05	0.0014449	837	4		0.282256	0.282646	0.282563	0.282518	9.28521	0.832612	1.12083	0.937073
MB_AJ25_20	0.282566	2.06303e-05	0.0014449	837	4		0.282256	0.282646	0.282563	0.282543	10.1518	0.72206	1.06646	0.882513
MB_AJ25_24	0.282566	2.32877e-05	0.000534783	837	4		0.282256	0.282646	0.282563	0.282557	10.659	0.815068	1.0346	0.850546
Mirbat
MR15-01
MB_MR1_01	0.282533	2.62078e-05	0.000460775	837	11		0.282256	0.282646	0.282563	0.282525	9.52722	0.917275	1.10565	0.921841
MB_MR1_02	0.282533	2.80406e-05	0.00137318	809	6		0.282274	0.282666	0.282583	0.282512	8.43095	0.981422	1.15229	0.967868
MB_MR1_03	0.282551	2.80406e-05	0.000829474	809	6		0.282274	0.282666	0.282583	0.282538	9.35603	0.981422	1.09425	0.909631
MB_MR1_06	0.282558	1.74885e-05	0.000495602	809	6		0.282274	0.282666	0.282583	0.282551	9.80292	0.612098	1.06619	0.881474
MB_MR1_07	0.282548	2.21814e-05	0.000495602	809	6		0.282274	0.282666	0.282583	0.282541	9.43559	0.77635	1.08926	0.904619
MB_MR1_11	0.282548	3.04291e-05	0.000739113	835	12		0.282258	0.282647	0.282565	0.282536	9.87824	1.06502	1.08205	0.898096
MB_MR1_12	0.28254	2.2315e-05	0.00191381	809	6		0.282274	0.282666	0.282583	0.282511	8.37629	0.781024	1.15572	0.971307
MB_MR1_13	0.282539	1.77693e-05	0.000675632	832	19		0.28226	0.28265	0.282567	0.282528	9.5089	0.621927	1.10285	0.918888
MB_MR1_15	0.282494	1.77693e-05	0.000680997	809	6		0.282274	0.282666	0.282583	0.282484	7.43541	0.621927	1.21468	1.03047
MB_MR1_18	0.282506	1.84705e-05	0.000657602	809	6		0.282274	0.282666	0.282583	0.282496	7.86674	0.646469	1.18766	1.00336
MB_MR1_25	0.28251	2.19067e-05	0.000516664	809	6		0.282274	0.282666	0.282583	0.282502	8.07633	0.766736	1.17452	0.990176
MR15-02
MB_MR2_11	0.28257	2.58782e-05	0.000466655	795	20		0.282283	0.282676	0.282593	0.282563	9.90092	0.905736	1.04896	0.863792
MB_MR2_16	0.282566	1.8785e-05	0.00138247	795	20		0.282283	0.282676	0.282593	0.282545	9.28135	0.657475	1.08787	0.902845
MB_MR2_21	0.282562	2.37722e-05	0.000967805	795	20		0.282283	0.282676	0.282593	0.282548	9.38084	0.832028	1.08163	0.896576
MB_MR2_24	0.282575	1.88903e-05	0.000804252	795	20		0.282283	0.282676	0.282593	0.282563	9.9095	0.661161	1.04842	0.863252
MB_MR2_25	0.282587	1.94261e-05	0.00107048	795	20		0.282283	0.282676	0.282593	0.282571	10.2068	0.679914	1.02973	0.844504
MB_MR2_28	0.282574	2.44159e-05	0.000942535	795	20		0.282283	0.282676	0.282593	0.28256	9.82001	0.854558	1.05404	0.868894
MB_MR2_30	0.282588	2.46471e-05	0.000776382	795	20		0.282283	0.282676	0.282593	0.282577	10.3941	0.862647	1.01796	0.832688
MB_MR2_35	0.282576	2.1432e-05	0.000613593	795	20		0.282283	0.282676	0.282593	0.282566	10.0377	0.75012	1.04036	0.855166
MB_MR2_38	0.282581	2.67746e-05	0.000748586	795	20		0.282283	0.282676	0.282593	0.28257	10.1569	0.937111	1.03287	0.847647
MB_MR2_39	0.282577	2.32465e-05	0.00255953	795	20		0.282283	0.282676	0.282593	0.282538	9.0439	0.813629	1.10278	0.917804
MR15-04
MB_MR4_01	0.282606	2.02041e-05	0.00154788	840	11		0.282254	0.282644	0.282561	0.282582	11.6022	0.707144	0.977711	0.793541
MB_MR4_03	0.2826	1.94429e-05	0.000854497	795	8		0.282283	0.282676	0.282593	0.282588	10.7847	0.680501	0.993394	0.808038
MB_MR4_06	0.282516	2.44697e-05	0.0010735	840	11		0.282254	0.282644	0.282561	0.282499	8.65207	0.85644	1.1629	0.979362
MB_MR4_11	0.282594	3.32462e-05	0.00356078	795	8		0.282283	0.282676	0.282593	0.28254	9.11736	1.16362	1.09817	0.913177
MB_MR4_15	0.282593	2.71784e-05	0.0018278	795	8		0.282283	0.282676	0.282593	0.282566	10.0157	0.951245	1.04174	0.856553
MB_MR4_18	0.28258	2.45319e-05	0.00164321	795	8		0.282283	0.282676	0.282593	0.282556	9.65608	0.858616	1.06434	0.879229
MB_MR4_19	0.282621	2.29265e-05	0.000996875	795	8		0.282283	0.282676	0.282593	0.282606	11.4434	0.802427	0.951944	0.766444
MB_MR4_20	0.282598	5.17129e-05	0.00154162	795	8		0.282283	0.282676	0.282593	0.282575	10.3228	1.80995	1.02244	0.837182
MB_MR4_23	0.282628	2.98531e-05	0.0019916	795	8		0.282283	0.282676	0.282593	0.282598	11.1498	1.04486	0.970425	0.784989
MB_MR4_24	0.282597	3.12207e-05	0.000936092	795	8		0.282283	0.282676	0.282593	0.282583	10.6189	1.09272	1.00382	0.818502
MB_MR4_28	0.282597	2.60314e-05	0.00118953	795	8		0.282283	0.282676	0.282593	0.282579	10.4806	0.911098	1.01252	0.82723
MB_MR4_31	0.28258	2.85401e-05	0.000283391	795	8		0.282283	0.282676	0.282593	0.282576	10.375	0.998905	1.01916	0.833889
MR15-05
MB_MR5_04	0.282568	2.98441e-05	0.000329056	765	5		0.282302	0.282698	0.282615	0.282564	9.25798	1.04454	1.06564	0.879704
MB_MR5_05	0.282559	2.81541e-05	0.000316356	765	5		0.282302	0.282698	0.282615	0.282555	8.94273	0.985393	1.08544	0.899581
MB_MR5_06	0.282567	1.86097e-05	0.00040976	765	5		0.282302	0.282698	0.282615	0.282561	9.15912	0.65134	1.07185	0.885938
MB_MR5_07	0.282558	1.90467e-05	0.000308676	765	5		0.282302	0.282698	0.282615	0.282553	8.88873	0.666633	1.08884	0.902985
MB_MR5_08	0.282552	1.56635e-05	0.000325351	765	5		0.282302	0.282698	0.282615	0.282547	8.67016	0.548224	1.10256	0.916761
MB_MR5_10	0.282579	1.95274e-05	0.000224051	765	5		0.282302	0.282698	0.282615	0.282576	9.68719	0.683459	1.03866	0.85263
MB_MR5_11	0.282564	1.64234e-05	0.000259478	765	5		0.282302	0.282698	0.282615	0.28256	9.13972	0.574818	1.07307	0.887161
MB_MR5_12	0.282565	2.00904e-05	0.000193349	765	5		0.282302	0.282698	0.282615	0.282562	9.21888	0.703163	1.06809	0.88217
MB_MR5_14	0.282543	2.08292e-05	0.000610705	765	5		0.282302	0.282698	0.282615	0.282534	8.22266	0.729023	1.13066	0.944953
MB_MR5_17	0.282571	1.8202e-05	0.000487936	765	5		0.282302	0.282698	0.282615	0.282564	9.27716	0.637071	1.06443	0.878495
MB_MR5_18	0.282564	2.13113e-05	0.00234161	765	5		0.282302	0.282698	0.282615	0.28253	8.08289	0.745895	1.13943	0.953756
MR15-07
MB_MR7_05	0.282605	3.25788e-05	0.00193853	850	9		0.282248	0.282636	0.282554	0.282574	11.5585	1.14026	0.988405	0.804547
MB_MR7_06	0.2826	2.19624e-05	0.000817275	850	9		0.282248	0.282636	0.282554	0.282587	12.0037	0.768683	0.960412	0.776459
MB_MR7_11	0.282579	2.16474e-05	0.00115399	850	9		0.282248	0.282636	0.282554	0.282561	11.0703	0.757658	1.01909	0.835335
MB_MR7_12	0.282584	3.55599e-05	0.000876978	850	9		0.282248	0.282636	0.282554	0.28257	11.4115	1.2446	0.997642	0.813816
MB_MR7_16	0.282568	3.03367e-05	0.00117541	850	9		0.282248	0.282636	0.282554	0.28255	10.6812	1.06178	1.04352	0.859852
MB_MR7_18	0.28257	1.85819e-05	0.00153309	850	9		0.282248	0.282636	0.282554	0.282545	10.5206	0.650367	1.05361	0.869974
MB_MR7_19	0.282563	2.44649e-05	0.00187002	850	9		0.282248	0.282636	0.282554	0.282533	10.0887	0.85627	1.08072	0.897175
MB_MR7_22	0.282567	2.09693e-05	0.000709511	850	9		0.282248	0.282636	0.282554	0.282555	10.8874	0.733926	1.03058	0.846863
MB_MR7_23	0.282603	2.2266e-05	0.0010464	997	11		0.282154	0.282529	0.282449	0.282583	15.1892	0.77931	0.877589	0.697406
MB_MR7_24	0.282582	2.49784e-05	0.000676336	850	9		0.282248	0.282636	0.282554	0.282571	11.4567	0.874243	0.994806	0.81097
MB_MR7_32	0.282567	3.12072e-05	0.00107912	850	9		0.282248	0.282636	0.282554	0.28255	10.6884	1.09225	1.04307	0.859404
MB_MR7_36	0.282605	2.24823e-05	0.00107824	850	9		0.282248	0.282636	0.282554	0.282588	12.0483	0.78688	0.957608	0.773644

## Sheet: Metasediments
Analyses	Hf176/Hf177	2 S.E.	Lu176/Hf177	Interpreted crystallisation age (Ma)	Uncertainty (2sigma)		Hf Chur (t)	Hf DM (t)	Hf NC(t)	Hfi	epsilon	2s	T(DM) (Crustal)	T(NC) (Crustal)
Ayn Fomration, Mirbat
MB_MR14_01	0.282567	2.37222e-05	0.0019474	789	12		0.282287	0.282681	0.282598	0.282538	8.90019	0.830276	1.10706	0.921937
MB_MR14_04	0.282593	2.5628e-05	0.00184129	792	14		0.282285	0.282679	0.282596	0.282566	9.95363	0.896981	1.04327	0.858004
MB_MR14_09	0.282645	2.75202e-05	0.00151594	824	14		0.282265	0.282655	0.282573	0.282621	12.6374	0.963207	0.899829	0.714949
MB_MR14_16	0.282615	2.67813e-05	0.00185699	811	12		0.282273	0.282665	0.282582	0.282587	11.1111	0.937346	0.985559	0.800617
MB_MR14_29	0.282576	2.80002e-05	0.00159011	632	9		0.282387	0.282795	0.28271	0.282558	6.05282	0.980006	1.16244	0.973189
MB_MR14_62	0.282622	4.80206e-05	0.00353984	681	11		0.282356	0.282759	0.282675	0.282577	7.83907	1.68072	1.08861	0.900444
MB_MR14_97	0.282634	5.62834e-05	0.00239158	830.2	12.96		0.282261	0.282651	0.282568	0.282596	11.8895	1.96992	0.951848	0.767319
MB_MR14_98	0.282638	3.80704e-05	0.00191334	940.4	14.53		0.282191	0.282571	0.282489	0.282604	14.6689	1.33247	0.864928	0.683141
MB_MR14_99	0.282521	3.31409e-05	0.00116485	842	12.73		0.282253	0.282642	0.28256	0.282503	8.8435	1.15993	1.15248	0.968964
MB_MR14_100	0.282579	2.69503e-05	0.000768033	818	14		0.282268	0.28266	0.282577	0.282567	10.5732	0.94326	1.02493	0.840316
MB_MR14_110	0.282593	2.99971e-05	0.00206797	749	11		0.282312	0.28271	0.282626	0.282564	8.90839	1.0499	1.07497	0.888631
MB_MR14_112	0.282582	2.72389e-05	0.00138068	780	13		0.282293	0.282687	0.282604	0.282561	9.52114	0.95336	1.06095	0.875419
MB_MR14_113	0.282648	2.40789e-05	0.00104115	742	11		0.282317	0.282715	0.282631	0.282633	11.2019	0.842761	0.925082	0.738026
MB_MR14_115	0.2826	2.33948e-05	0.000548569	766	13		0.282302	0.282697	0.282614	0.282592	10.2854	0.818819	1.00182	0.815696
Al Wafi Schist
Ja1543-2a	0.28238	0.000100162	0.000977765	851.6	11.09		0.282247	0.282635	0.282553	0.282365	4.16392	3.50569	1.45248	1.27025
Ja1543-3a	0.281397	0.000637414	0.000925986	1621.1	18.13		0.281754	0.282071	0.281998	0.281369	-13.6529	22.3095	3.13179	2.9755
Ja1543-6a	0.282081	5.59999e-05	0.000741203	892.8	10.56		0.282221	0.282605	0.282523	0.282068	-5.4002	1.96	2.07671	1.89771
Ja1543-7a	0.282118	6.72339e-05	0.000510702	867	10.5		0.282237	0.282624	0.282542	0.28211	-4.51368	2.35319	2.00233	1.82238
Ja1543-8a	0.281994	4.8212e-05	0.00102451	1429.3	16.5		0.281877	0.282213	0.282137	0.281966	3.15126	1.68742	1.96745	1.80256
Ja1543-9a	0.281551	7.0308e-05	0.00116614	1473.5	17.01		0.281849	0.28218	0.282105	0.281518	-11.7318	2.46078	2.90466	2.7438
Ja1543-16a	0.282093	6.951e-05	0.00126462	853.3	10.99		0.282246	0.282634	0.282552	0.282072	-6.14975	2.43285	2.09267	1.91265
Ja1543-17b	0.282414	5.29682e-05	0.00079079	826.8	10.26		0.282263	0.282653	0.282571	0.282402	4.93295	1.85389	1.38511	1.20198
Ja1543-22a	0.281847	5.49311e-05	0.000853653	1567.6	18.57		0.281788	0.282111	0.282037	0.281822	1.20578	1.92259	2.19457	2.03408
Ja1543-27a	0.282162	4.38769e-05	0.000782845	856.7	10.61		0.282244	0.282632	0.282549	0.282149	-3.35613	1.53569	1.92298	1.74249
Ja1543-43a	0.282171	0.000119102	0.00127338	889.6	11.33		0.282223	0.282608	0.282526	0.28215	-2.5795	4.16856	1.90032	1.72064
Ja1543-48a	0.280882	7.04691e-05	0.00130841	2532	27.34		0.28116	0.281393	0.28133	0.280819	-12.1519	2.46642	3.7381	3.6072
Ja1543-50a	0.281775	4.09175e-05	0.000779596	1644.9	19.41		0.281738	0.282054	0.28198	0.28175	0.424223	1.43211	2.30251	2.14441
Ja1543-52a	0.282501	3.47293e-05	0.000666002	859.3	11		0.282242	0.28263	0.282547	0.28249	8.774	1.21553	1.1705	0.987522
Ja1543-53a	0.28244	5.69869e-05	0.000835718	876.5	11.09		0.282231	0.282617	0.282535	0.282427	6.91887	1.99454	1.30011	1.11804
Ja1543-54a	0.282466	9.16628e-05	0.00201038	903.6	11.43		0.282214	0.282597	0.282516	0.282431	7.70514	3.2082	1.27233	1.09091
Ja1543-55a	0.282169	5.7796e-05	0.000634924	813.9	10.21		0.282271	0.282663	0.28258	0.28216	-3.94383	2.02286	1.92643	1.74479
Ja1543-56a	0.282498	5.63399e-05	0.00191241	825.6	9.69		0.282264	0.282654	0.282571	0.282469	7.26608	1.9719	1.23834	1.05467
Ja1543-57a	0.282425	4.41224e-05	0.000743519	846.3	9.82		0.28225	0.282639	0.282557	0.282414	5.78045	1.54428	1.34749	1.16476
Ja1543-58a	0.281968	0.000246127	0.00197568	782.2	9.06		0.282291	0.282686	0.282603	0.281939	-12.4666	8.61443	2.42673	2.24593
Ja1543-61a	0.282683	0.000445548	0.0021426	866.4	10.24		0.282238	0.282624	0.282542	0.282648	14.5427	15.5942	0.813615	0.62961
Ja1543-62a	0.282488	5.62558e-05	0.00220006	833.4	9.7		0.282259	0.282648	0.282566	0.282453	6.8959	1.96895	1.26764	1.08429
Ja1543-63a	0.282415	5.25945e-05	0.00103809	832.3	9.68		0.282259	0.282649	0.282567	0.282399	4.9403	1.84081	1.38896	1.20599
Ja1543-65a	0.282507	0.000376393	0.00108971	838.6	9.83		0.282255	0.282645	0.282562	0.28249	8.31687	13.1737	1.18279	0.999288
Ja1543-67a	0.282437	0.000670492	0.00163549	835.7	9.79		0.282257	0.282647	0.282564	0.282411	5.44437	23.4672	1.36016	1.17718
Ja1543-69a	0.282615	0.000578622	0.00149709	787.5	9.31		0.282288	0.282682	0.282599	0.282593	10.8022	20.2518	0.986345	0.800758
Ja1543-71a	0.281475	0.000226105	0.00084893	2403.8	24.69		0.281244	0.281489	0.281425	0.281436	6.80617	7.91369	2.51768	2.38037
Ja1543-72a	0.282141	2.08188e-05	0.000406753	893.6	10.43		0.28222	0.282605	0.282523	0.282134	-3.04379	0.728658	1.93207	1.75261
Ja1543-73a	0.282511	2.9013e-05	0.00105808	830.1	9.67		0.282261	0.282651	0.282568	0.282495	8.28712	1.01545	1.17795	0.994197
Ja1543-75a	0.282055	8.73235e-05	0.0012305	845	9.98		0.282251	0.28264	0.282558	0.282035	-7.65822	3.05632	2.17916	1.99921
Ja1543-76a	0.282162	6.66831e-05	0.00126724	857.2	9.75		0.282244	0.282631	0.282549	0.282141	-3.62913	2.33391	1.94023	1.75981
Ja1543-77a	0.282222	6.79805e-05	0.0019913	818.4	9.44		0.282268	0.282659	0.282577	0.282191	-2.74004	2.37932	1.85545	1.67369
Ja1543-78a	0.282319	0.000107234	0.00242612	857	10.2		0.282244	0.282631	0.282549	0.28228	1.2755	3.75317	1.63636	1.45491
